# Supplementary material
Source: MDPI journal article supplement (https://www.mdpi.com/2072-4292/15/22/5430)
Supplement: s1 [file s1 › remotesensing-2574311-supplementary.pdf]

## Scripts and Figures

### MODIS data download

To optimize the download process, we used the script “order\_MWS.pl”, available from:

<https://ladsweb.modaps.eosdis.nasa.gov/tools-and-services/>.

Script N°1: Comparative spectral fusion methods.

Script N°2: Quality Index for comparative spectral fusion.

Script N°3: Batch process with spectral fusion for an operative implementation.

Script N°4: Batch process for snow detection, cloud correction, and albedo.

Script N°5: Spatio-temporal snow cover reconstruction.

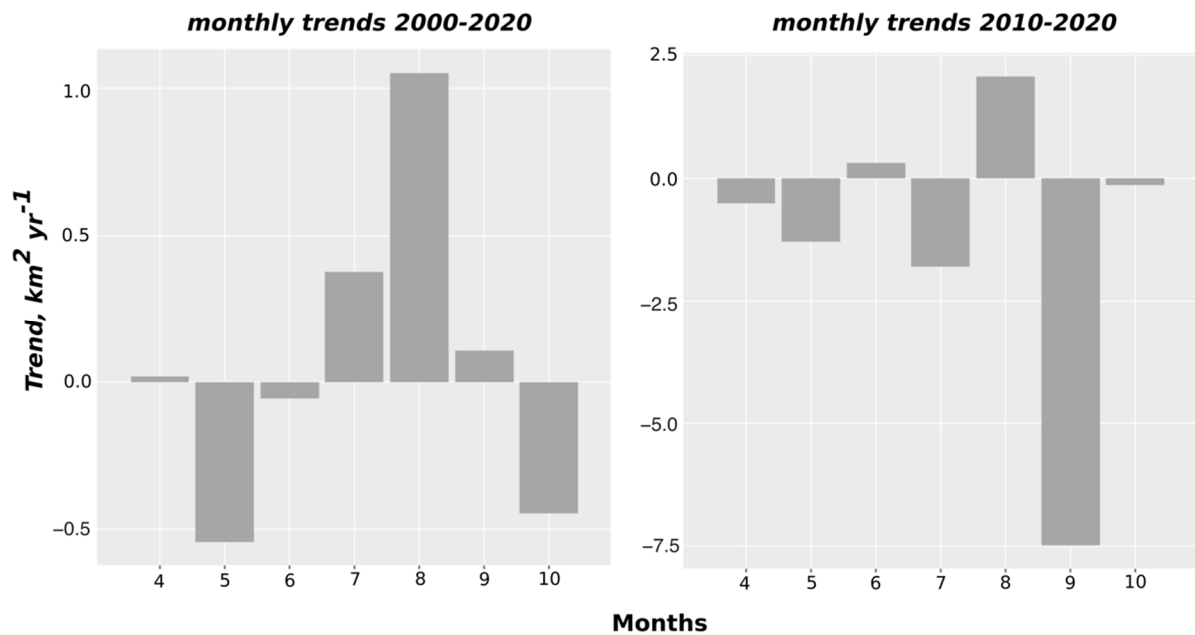

Figure S1. Monthly trend of snow cover area in the Brunswick Peninsula.

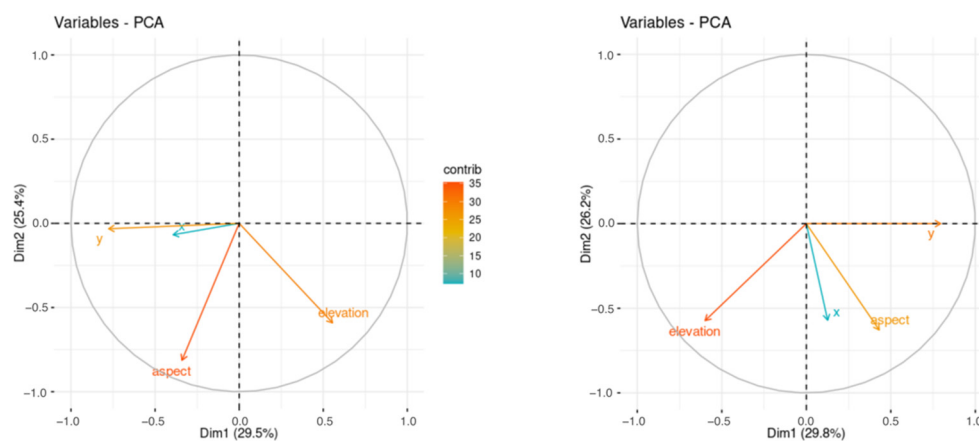

Figure S2. PCA of snow-days average and trend.

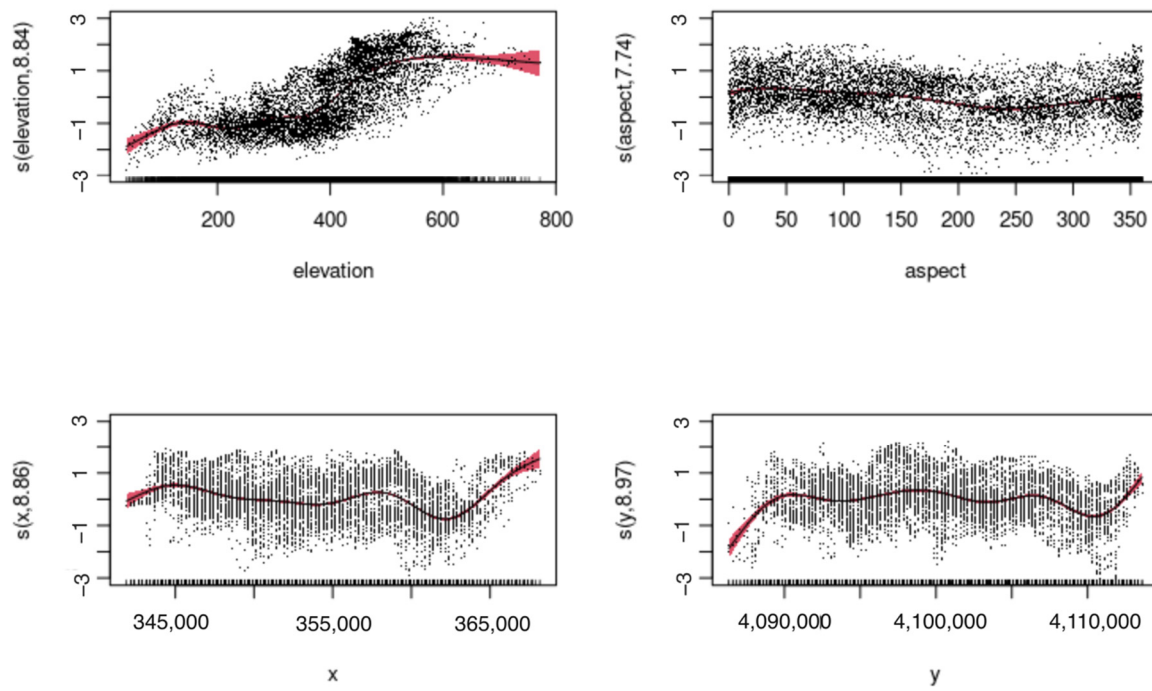

**Figure S3.** Generalized additive models to  $\text{Mod\_av}$ .

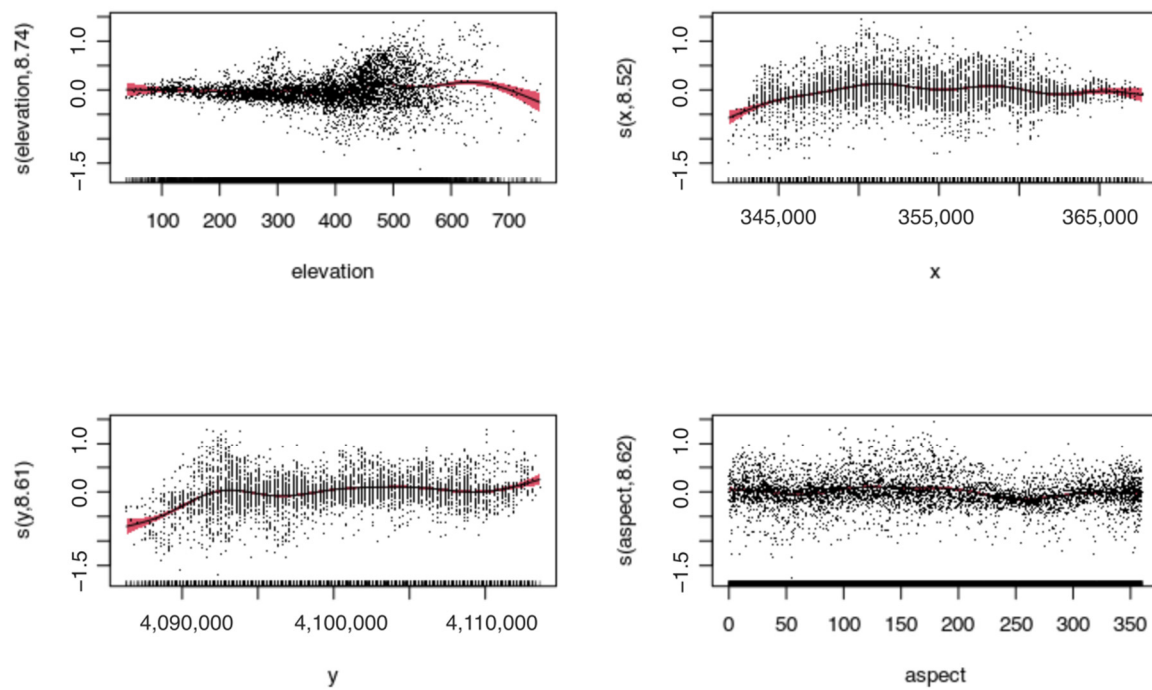

**Figure S4.** Generalized additive models to  $\text{Mod\_trend}$ .
